# Supplementary material
Source: PubMed Central journal article supplement (PMC10729690)
Supplement: jcm.00952-23-s0001.pdf [file jcm.00952-23-s0001.pdf]

| Specimen Type                        | Clinical history        | Total Tested (n) | Total Positive (n) | Fraction Positive (95% CI) | Bacteria Tested (n) | Bacteria Positive (n) | Bacteria Fraction Positive (95% CI) | AFB Tested (n) | AFB Positive (n) | AFB Fraction Positive (95% CI) | Fungal Tested (n) | Fungal Positive (n) | Fungal Fraction Positive (95% CI) |
|--------------------------------------|-------------------------|------------------|--------------------|----------------------------|---------------------|-----------------------|-------------------------------------|----------------|------------------|--------------------------------|-------------------|---------------------|-----------------------------------|
| <b>Artery</b>                        |                         | <b>9</b>         | <b>3</b>           | <b>0.33 (0.23-0.44)</b>    | <b>9</b>            | <b>2</b>              | <b>0.22 (0.16-0.28)</b>             | <b>4</b>       | <b>0</b>         | <b>0</b>                       | <b>6</b>          | <b>1</b>            | <b>0.17 (0.12-0.22)</b>           |
|                                      | Aortitis/ arteritis     | 7                | 3                  | 0.42 (0.27-0.59)           | 7                   | 2                     | 0.29 (0.19-0.38)                    | 4              | 0                | 0                              | 5                 | 1                   | 0.2 (0.13-0.27)                   |
|                                      | Abscess                 | 1                | 0                  | 0                          | 1                   | 0                     | 0                                   | 0              | 0                | 0                              | 1                 | 0                   | 0                                 |
|                                      | Endocarditis            | 1                | 0                  | 0                          | 1                   | 0                     | 0                                   | 0              | 0                | 0                              | 0                 | 0                   | 0                                 |
| <b>Bronchoalveolar lavage/sputum</b> |                         | <b>8</b>         | <b>5</b>           | <b>0.63 (0.42-0.83)</b>    | <b>2</b>            | <b>2</b>              | <b>1</b>                            | <b>3</b>       | <b>1</b>         | <b>0.33 (0.16-0.51)</b>        | <b>3</b>          | <b>2</b>            | <b>0.67 (0.31-1)</b>              |
|                                      | Pneumonia               | 8                | 5                  | 0.63 (0.42-0.83)           | 2                   | 2                     | 1                                   | 3              | 1                | 0.33 (0.16-0.51)               | 3                 | 2                   | 0.67 (0.31-1)                     |
| <b>Bone</b>                          |                         | <b>148</b>       | <b>22</b>          | <b>0.15 (0.14-0.16)</b>    | <b>145</b>          | <b>18</b>             | <b>0.12 (0.12-0.13)</b>             | <b>56</b>      | <b>2</b>         | <b>0.036 (0.03-0.04)</b>       | <b>56</b>         | <b>2</b>            | <b>0.036 (0.03-0.04)</b>          |
|                                      | Osteomyelitis/ discitis | 121              | 20                 | 0.17 (0.15-0.18)           | 120                 | 18                    | 0.15 (0.14-0.16)                    | 44             | 1                | 0.023 (0.02-0.02)              | 46                | 1                   | 0.023 (0.02-0.02)                 |
|                                      | Abscess                 | 11               | 0                  | 0                          | 11                  | 0                     | 0                                   | 2              | 0                | 0                              | 2                 | 0                   | 0                                 |
|                                      | Mass/lesion             | 3                | 1                  | 0.33 (0.16-0.51)           | 3                   | 0                     | 0                                   | 3              | 0                | 0                              | 3                 | 1                   | 0.33 (0.16-0.51)                  |
|                                      | Non-healing wound       | 7                | 0                  | 0                          | 7                   | 0                     | 0                                   | 2              | 0                | 0                              | 3                 | 0                   | 0                                 |
|                                      | Other                   | 6                | 1                  | 0.17 (0.12-0.22)           | 4                   | 0                     | 0                                   | 5              | 1                | 0.2 (0.13-0.27)                | 2                 | 0                   | 0                                 |
| <b>Brain</b>                         |                         | <b>11</b>        | <b>3</b>           | <b>0.27 (0.2 – 0.34)</b>   | <b>9</b>            | <b>1</b>              | <b>0.12 (0.09-0.13)</b>             | <b>9</b>       | <b>1</b>         | <b>0.11 (0.09-0.13)</b>        | <b>8</b>          | <b>2</b>            | <b>0.25 (0.17-0.33)</b>           |
|                                      | Meningitis              | 4                | 0                  | 0                          | 3                   | 0                     | 0                                   | 4              | 0                | 0                              | 4                 | 0                   | 0                                 |
|                                      | Abscess                 | 4                | 3                  | 0.75 (0.43-1.0)            | 3                   | 1                     | 0.33 (0.16-0.51)                    | 2              | 1                | 0.5 (0.15-0.85)                | 4                 | 2                   | 0.5 (0.26-0.75)                   |
|                                      | Mass/lesion             | 2                | 0                  | 0                          | 2                   | 0                     | 0                                   | 2              | 0                | 0                              | 0                 | 0                   | 0                                 |
|                                      | Granuloma               | 1                | 0                  | 0                          | 1                   | 0                     | 0                                   | 1              | 0                | 0                              | 0                 | 0                   | 0                                 |
| <b>Breast</b>                        |                         | <b>17</b>        | <b>5</b>           | <b>0.29 (0.23-0.36)</b>    | <b>17</b>           | <b>5</b>              | <b>0.29 (0.23-0.36)</b>             | <b>11</b>      | <b>0</b>         | <b>0</b>                       | <b>5</b>          | <b>0</b>            | <b>0</b>                          |

|                               |                        |           |           |                             |           |           |                              |           |          |                             |           |          |                              |
|-------------------------------|------------------------|-----------|-----------|-----------------------------|-----------|-----------|------------------------------|-----------|----------|-----------------------------|-----------|----------|------------------------------|
|                               | Abscess                | 2         | 0         | 0                           | 2         | 0         | 0                            | 1         | 0        | 0                           | 0         | 0        | 0                            |
|                               | Granulomatous mastitis | 15        | 5         | 0.33<br>(0.25-0.41)         | 15        | 5         | 0.33<br>(0.25-0.41)          | 10        | 0        | 0                           | 5         | 0        | 0                            |
| <b>CSF</b>                    |                        | <b>26</b> | <b>4</b>  | <b>0.15<br/>(0.13-0.17)</b> | <b>22</b> | <b>3</b>  | <b>0.14<br/>(0.12-0.16)</b>  | <b>9</b>  | <b>0</b> | <b>0</b>                    | <b>15</b> | <b>1</b> | <b>0.067<br/>(0.06-0.08)</b> |
|                               | Meningitis             | 24        | 4         | 0.17<br>(0.14-0.19)         | 20        | 3         | 0.15<br>(0.13-0.17)          | 8         | 0        | 0                           | 14        | 1        | 0.07<br>(0.06-0.08)          |
|                               | Abscess                | 2         | 0         | 0                           | 2         | 0         | 0                            | 1         | 0        | 0                           | 1         | 0        | 0                            |
| <b>Digit</b>                  |                        | <b>6</b>  | <b>0</b>  | <b>0</b>                    | <b>4</b>  | <b>0</b>  | <b>0</b>                     | <b>6</b>  | <b>0</b> | <b>0</b>                    | <b>5</b>  | <b>0</b> | <b>0</b>                     |
|                               | Cellulitis             | 3         | 0         | 0                           | 2         | 0         | 0                            | 3         | 0        | 0                           | 2         | 0        | 0                            |
|                               | Osteomyelitis          | 3         | 0         | 0                           | 2         | 0         | 0                            | 3         | 0        | 0                           | 3         | 0        | 0                            |
| <b>Intervertebral disc</b>    |                        | <b>17</b> | <b>1</b>  | <b>0.06<br/>(0.05-0.07)</b> | <b>15</b> | <b>1</b>  | <b>0.067<br/>(0.06-0.08)</b> | <b>5</b>  | <b>0</b> | <b>0</b>                    | <b>5</b>  | <b>0</b> | <b>0</b>                     |
|                               | Osteomyelitis/discitis | 16        | 1         | 0.063<br>(0.06-0.07)        | 14        | 1         | 0.071<br>(0.06-0.08)         | 5         | 0        | 0                           | 5         | 0        | 0                            |
|                               | Abscess                | 1         | 0         | 0                           | 1         | 0         | 0                            | 0         | 0        | 0                           | 0         | 0        | 0                            |
| <b>Epidural/Paravertebral</b> |                        | <b>26</b> | <b>10</b> | <b>0.38<br/>(0.31-0.46)</b> | <b>25</b> | <b>6</b>  | <b>0.24<br/>(0.20-0.28)</b>  | <b>7</b>  | <b>1</b> | <b>0.14<br/>(0.11-0.18)</b> | <b>9</b>  | <b>3</b> | <b>0.33<br/>(0.23-0.44)</b>  |
|                               | Osteomyelitis          | 9         | 3         | 0.33<br>(0.23-0.43)         | 9         | 1         | 0.11<br>(0.09-0.13)          | 3         | 0        | 0                           | 5         | 2        | 0.4<br>(0.23-0.57)           |
|                               | Abscess/Phlegmon       | 16        | 6         | 0.38<br>(0.29-0.46)         | 15        | 4         | 0.27<br>(0.21-0.33)          | 4         | 1        | 0.25<br>(0.14-0.36)         | 4         | 1        | 0.25<br>(0.14-0.36)          |
|                               | Non-healing wound      | 1         | 1         | 1                           | 1         | 1         | 1                            | 0         | 0        | 0                           | 0         | 0        | 0                            |
| <b>Foreign Body</b>           |                        | <b>7</b>  | <b>3</b>  | <b>0.43<br/>(0.27-0.59)</b> | <b>7</b>  | <b>3</b>  | <b>0.43<br/>(0.27-0.59)</b>  | <b>0</b>  | <b>0</b> | <b>0</b>                    | <b>2</b>  | <b>0</b> | <b>0</b>                     |
|                               | Septic arthritis       | 4         | 3         | 0.75<br>(0.43-1)            | 4         | 3         | 0.75<br>(0.43-1)             | 0         | 0        | 0                           | 0         | 0        | 0                            |
|                               | Endocarditis           | 3         | 0         | 0                           | 3         | 0         | 0                            | 0         | 0        | 0                           | 2         | 0        | 0                            |
| <b>Joint Fluid</b>            |                        | <b>67</b> | <b>15</b> | <b>0.22 (0.17-0.27)</b>     | <b>66</b> | <b>15</b> | <b>0.23<br/>(0.18-0.28)</b>  | <b>16</b> | <b>0</b> | <b>0</b>                    | <b>18</b> | <b>0</b> | <b>0</b>                     |
|                               | Septic arthritis       | 59        | 12        | 0.20 (0.15-0.26)            | 59        | 12        | 0.20<br>(0.15-0.26)          | 12        | 0        | 0                           | 15        | 0        | 0                            |

|                     |                   |           |           |                          |           |           |                         |           |          |                            |           |           |                           |
|---------------------|-------------------|-----------|-----------|--------------------------|-----------|-----------|-------------------------|-----------|----------|----------------------------|-----------|-----------|---------------------------|
|                     | Osteomyelitis     | 5         | 1         | 0.2 (0.02-0.38)          | 5         | 1         | 0.2 (0.02-0.38)         | 3         | 0        | 0                          | 3         | 0         | 0                         |
|                     | abscess           | 2         | 1         | 0.5 (0.15-0.85)          | 1         | 1         | 1                       | 1         | 0        | 0                          | 0         | 0         | 0                         |
|                     | Other             | 1         | 1         | 1                        | 1         | 1         | 1                       | 0         | 0        | 0                          | 0         | 0         | 0                         |
| <b>Joint Tissue</b> |                   | <b>98</b> | <b>13</b> | <b>0.13 (0.098-0.17)</b> | <b>95</b> | <b>11</b> | <b>0.12 (0.08-0.15)</b> | <b>30</b> | <b>1</b> | <b>0.03 (0.0006-0.066)</b> | <b>24</b> | <b>2</b>  | <b>0.083 (0.027-0.14)</b> |
|                     | Septic arthritis  | 73        | 11        | 0.15 (0.11-0.19)         | 71        | 9         | 0.13 (0.09-0.17)        | 21        | 1        | 0.048 (0.001-0.094)        | 16        | 2         | 0.13 (0.04-0.21)          |
|                     | Osteomyelitis     | 12        | 1         | 0.083 (0.004-0.16)       | 12        | 1         | 0.083 (0.004-0.16)      | 3         | 0        | 0                          | 4         | 0         | 0                         |
|                     | non-healing wound | 5         | 1         | 0.2 (0.02-0.38)          | 5         | 1         | 0.2 (0.02-0.38)         | 1         | 0        | 0                          | 1         | 0         | 0                         |
|                     | abscess           | 4         | 0         | 0                        | 4         | 0         | 0                       | 2         | 0        | 0                          | 1         | 0         | 0                         |
|                     | Other             | 4         | 0         | 0                        | 3         | 0         | 0                       | 3         | 0        | 0                          | 2         | 0         | 0                         |
| <b>Liver</b>        |                   | <b>14</b> | <b>1</b>  | <b>0.25 (0.19-0.31)</b>  | <b>10</b> | <b>1</b>  | <b>0.25 (0.14-0.38)</b> | <b>9</b>  | <b>0</b> | <b>0</b>                   | <b>4</b>  | <b>0</b>  | <b>0</b>                  |
|                     | Granuloma         | 6         | 0         | 0                        | 3         | 0         | 0                       | 4         | 0        | 0                          | 1         | 0         | 0                         |
|                     | Abscess           | 4         | 1         | 0.25 (0.14-0.36)         | 4         | 1         | 0.25 (0.14-0.38)        | 2         | 0        | 0                          | 1         | 0         | 0                         |
|                     | Mass/lesion       | 3         | 0         | 0                        | 2         | 0         | 0                       | 2         | 0        | 0                          | 1         | 0         | 0                         |
|                     | Lymphadenopathy   | 1         | 0         | 0                        | 1         | 0         | 0                       | 1         | 0        | 0                          | 1         | 0         | 0                         |
| <b>Lung</b>         |                   | <b>52</b> | <b>15</b> | <b>0.29 (0.25-0.32)</b>  | <b>14</b> | <b>0</b>  | <b>0</b>                | <b>36</b> | <b>4</b> | <b>0.11 (0.10-0.12)</b>    | <b>36</b> | <b>11</b> | <b>0.31 (0.26-0.35)</b>   |
|                     | Granuloma         | 21        | 4         | 0.19 (0.16-0.22)         | 5         | 0         | 0                       | 16        | 2        | 0.13 (0.10-0.15)           | 13        | 2         | 0.15 (0.12-0.18)          |
|                     | Mass/lesion       | 19        | 8         | 0.42 (0.33-0.51)         | 3         | 0         | 0                       | 11        | 2        | 0.18 (0.14-0.22)           | 14        | 6         | 0.43 (0.32-0.54)          |
|                     | Pneumonia         | 11        | 3         | 0.27 (0.20-0.34)         | 6         | 0         | 0                       | 8         | 0        | 0                          | 9         | 3         | 0.33 (0.23-0.44)          |
|                     | Lymphadenopathy   | 1         | 0         | 0                        | 0         | 0         | 0                       | 1         | 0        | 0                          | 0         | 0         |                           |
| <b>Lymph node</b>   |                   | <b>39</b> | <b>10</b> | <b>0.26 (0.22-0.29)</b>  | <b>23</b> | <b>4</b>  | <b>0.17</b>             | <b>32</b> | <b>4</b> | <b>0.13</b>                | <b>21</b> | <b>2</b>  | <b>0.095</b>              |

|                           |                      |           |          |                             |           |          |                             |           |          |                             |           |          |                              |
|---------------------------|----------------------|-----------|----------|-----------------------------|-----------|----------|-----------------------------|-----------|----------|-----------------------------|-----------|----------|------------------------------|
|                           |                      |           |          |                             |           |          | <b>(0.15-0.20)</b>          |           |          | <b>(0.11-0.14)</b>          |           |          | <b>(0.08-0.11)</b>           |
|                           | Granuloma            | 16        | 4        | 0.25<br>(0.20-0.30)         | 10        | 3        | 0.3<br>(0.21-0.39)          | 15        | 1        | 0.067<br>(0.06-0.08)        | 6         | 0        | 0                            |
|                           | Lymphadenopathy      | 22        | 5        | 0.23<br>(0.19-0.27)         | 12        | 0        | 0                           | 17        | 3        | 0.18<br>(0.14-0.21)         | 14        | 2        | 0.14<br>(0.12-0.17)          |
|                           | Mass/lesion          | 1         | 1        | 1                           | 1         | 1        | 1                           | 0         | 0        | 0                           | 1         | 0        | 0                            |
| <b>Pericardial fluid</b>  |                      | <b>4</b>  | <b>0</b> | <b>0</b>                    | <b>1</b>  | <b>0</b> | <b>0</b>                    | <b>4</b>  | <b>0</b> | <b>0</b>                    | <b>0</b>  | <b>0</b> | <b>0</b>                     |
|                           | Pericardial effusion | 1         | 0        | 0                           | 1         | 0        | 0                           | 1         | 0        | 0                           | 0         | 0        | 0                            |
|                           | Pericarditis         | 3         | 0        | 0                           | 0         | 0        | 0                           | 3         | 0        | 0                           | 0         | 0        | 0                            |
| <b>Pericardial tissue</b> |                      | <b>5</b>  | <b>0</b> | <b>0</b>                    | <b>2</b>  | <b>0</b> | <b>0</b>                    | <b>4</b>  | <b>0</b> | <b>0</b>                    | <b>2</b>  | <b>0</b> | <b>0</b>                     |
|                           | Pericardial effusion | 2         | 0        | 0                           | 0         | 0        | 0                           | 2         | 0        | 0                           | 0         | 0        | 0                            |
|                           | Pericarditis         | 3         | 0        | 0                           | 2         | 0        | 0                           | 2         | 0        | 0                           | 2         | 0        | 0                            |
| <b>Peritoneum</b>         |                      | <b>8</b>  | <b>3</b> | <b>0.38<br/>(0.25-0.50)</b> | <b>6</b>  | <b>2</b> | <b>0.33<br/>(0.25-0.50)</b> | <b>5</b>  | <b>0</b> | <b>0</b>                    | <b>6</b>  | <b>1</b> | <b>0.17<br/>(0.12-0.22)</b>  |
|                           | Peritonitis          | 7         | 3        | 0.43<br>(0.27-0.59)         | 5         | 2        | 0.4<br>(0.23-0.57)          | 4         | 0        | 0                           | 5         | 1        | 0.2<br>(0.13-0.27)           |
|                           | Abscess              | 1         | 0        | 0                           | 1         | 0        | 0                           | 1         | 0        | 0                           | 1         | 0        | 0                            |
| <b>Pleural fluid</b>      |                      | <b>9</b>  | <b>3</b> | <b>0.33 (0.18-0.49)</b>     | <b>5</b>  | <b>2</b> | <b>0.4<br/>(0.18-0.62)</b>  | <b>5</b>  | <b>1</b> | <b>0.2<br/>(0.02-0.38)</b>  | <b>4</b>  | <b>0</b> | <b>0</b>                     |
|                           | pleural effusion     | 9         | 3        | 0.33 (0.18-0.49)            | 5         | 2        | 0.4<br>(0.18-0.62)          | 5         | 1        | 0.2<br>(0.02-0.38)          | 4         | 0        | 0                            |
| <b>Pleural tissue</b>     |                      | <b>7</b>  | <b>4</b> | <b>0.57 (0.38-0.76)</b>     | <b>5</b>  | <b>4</b> | <b>0.8<br/>(0.62-0.98)</b>  | <b>5</b>  | <b>0</b> | <b>0</b>                    | <b>6</b>  | <b>1</b> | <b>0.17<br/>(0.014-0.32)</b> |
|                           | pleural effusion     | 4         | 3        | 0.75 (0.53-0.97)            | 4         | 3        | 0.75<br>(0.53-0.97)         | 2         | 0        | 0                           | 3         | 1        | 0.33<br>(0.06-0.61)          |
|                           | Other                | 3         | 1        | 0.33 (0.06-0.61)            | 1         | 1        | 1                           | 3         | 0        | 0                           | 3         | 0        | 0                            |
| <b>Skin</b>               |                      | <b>24</b> | <b>7</b> | <b>0.29<br/>(0.24-0.34)</b> | <b>10</b> | <b>3</b> | <b>0.3<br/>(0.21-0.39)</b>  | <b>20</b> | <b>1</b> | <b>0.05<br/>(0.05-0.05)</b> | <b>12</b> | <b>3</b> | <b>0.25<br/>(0.19-0.31)</b>  |
|                           | Cellulitis           | 9         | 3        | 0.33<br>(0.23-0.44)         | 5         | 2        | 0.4<br>(0.23-0.57)          | 6         | 0        | 0                           | 5         | 1        | 0.2<br>(0.13-0.27)           |

|                                         |                   |           |           |                             |           |           |                             |           |          |                             |           |          |                              |
|-----------------------------------------|-------------------|-----------|-----------|-----------------------------|-----------|-----------|-----------------------------|-----------|----------|-----------------------------|-----------|----------|------------------------------|
|                                         | Abscess           | 2         | 1         | 0.5<br>(0.15-0.85)          | 1         | 1         | 1                           | 2         | 0        | 0                           | 1         | 0        | 0                            |
|                                         | mass/lesion       | 4         | 1         | 0.25<br>(0.14-0.36)         | 2         | 0         | 0                           | 4         | 1        | 0.25<br>(0.14-0.36)         | 1         | 0        | 0                            |
|                                         | Granuloma         | 6         | 1         | 0.17<br>(0.12-0.22)         | 1         | 0         | 0                           | 6         | 0        | 0                           | 4         | 1        | 0.25<br>(0.14-0.36)          |
|                                         | Lymphadenopathy   | 1         | 0         | 0                           | 0         | 0         | NA                          | 1         | 0        | 0                           | 0         | 0        | 0                            |
|                                         | non-healing wound | 2         | 1         | 0.5<br>(0.15-0.85)          | 1         | 0         | 0                           | 1         | 0        | 0                           | 1         | 1        | 1                            |
| <b>Soft tissue</b>                      |                   | <b>58</b> | <b>17</b> | <b>0.29<br/>(0.26-0.33)</b> | <b>48</b> | <b>13</b> | <b>0.27<br/>(0.24-0.30)</b> | <b>25</b> | <b>3</b> | <b>0.12<br/>(0.10-0.14)</b> | <b>26</b> | <b>2</b> | <b>0.077<br/>(0.07-0.08)</b> |
|                                         | Abscess           | 20        | 7         | 0.35<br>(0.28-0.43)         | 19        | 5         | 0.26<br>(0.21-0.32)         | 7         | 1        | 0.14<br>(0.11-0.18)         | 8         | 1        | 0.13<br>(0.10-0.15)          |
|                                         | mass/lesion       | 6         | 2         | 0.33<br>(0.21-0.46)         | 5         | 2         | 0.4<br>(0.23-0.57)          | 4         | 1        | 0.25<br>(0.14-0.36)         | 4         | 0        | 0                            |
|                                         | Cellulitis        | 7         | 1         | 0.14<br>(0.11-0.18)         | 5         | 1         | 0.2<br>(0.13-0.27)          | 5         | 0        | 0                           | 4         | 0        | 0                            |
|                                         | Granuloma         | 4         | 1         | 0.25<br>(0.14-0.36)         | 1         | 1         | 1                           | 4         | 0        | 0                           | 2         | 0        | 0                            |
|                                         | Non-healing wound | 6         | 2         | 0.33<br>(0.21-0.46)         | 5         | 1         | 0.2<br>(0.21-0.46)          | 2         | 0        | 0                           | 4         | 1        | 0.25<br>(0.14-0.36)          |
|                                         | Osteomyelitis     | 6         | 2         | 0.33<br>(0.21-0.46)         | 6         | 2         | 0.33<br>(0.21-0.46)         | 1         | 0        | 0                           | 1         | 0        | 0                            |
|                                         | Septic arthritis  | 3         | 0         | 0                           | 3         | 0         | 0                           | 0         | 0        | 0                           | 0         | 0        | 0                            |
|                                         | Other             | 6         | 2         | 0.33<br>(0.21-0.46)         | 4         | 1         | 0.25<br>(0.14-0.36)         | 2         | 1        | 0.5<br>(0.15-0.85)          | 3         | 0        | 0                            |
| <b>Heart Valve</b>                      |                   | <b>19</b> | <b>11</b> | <b>0.58<br/>(0.45-0.71)</b> | <b>19</b> | <b>11</b> | <b>0.58<br/>(0.45-0.71)</b> | <b>5</b>  | <b>0</b> | <b>0</b>                    | <b>5</b>  | <b>1</b> | <b>0.2<br/>(0.13-0.27)</b>   |
|                                         | Endocarditis      | 19        | 11        | 0.58<br>(0.45-0.71)         | 19        | 11        | 0.58<br>(0.45-0.71)         | 4         | 0        | 0                           | 5         | 1        | 0.2<br>(0.13-0.27)           |
| <b>Other (&lt;5 specimens per type)</b> |                   | <b>29</b> | <b>8</b>  | <b>0.28<br/>(0.24-0.32)</b> | <b>15</b> | <b>2</b>  | <b>0.13<br/>(0.11-0.16)</b> | <b>15</b> | <b>0</b> | <b>0</b>                    | <b>16</b> | <b>6</b> | <b>0.38<br/>(0.29-.46)</b>   |
|                                         | Abscess           | 2         | 1         | 0.5<br>(0.15-0.85)          | 2         | 1         | 0.5<br>(0.15-0.85)          | 1         | 0        | 0                           | 1         | 0        | 0                            |

|                 |   |   |                     |   |   |                     |   |   |   |   |   |                     |
|-----------------|---|---|---------------------|---|---|---------------------|---|---|---|---|---|---------------------|
| Granuloma       | 7 | 0 | 0                   | 2 | 0 | 0                   | 6 | 0 | 0 | 1 | 0 | 0                   |
| Osteomyelitis   | 3 | 0 | 0                   | 2 | 0 | 0                   | 2 | 0 | 0 | 1 | 0 | 0                   |
| Mass/lesion     | 3 | 1 | 0.33<br>(0.16-0.51) | 2 | 0 | 0                   | 2 | 0 | 0 | 2 | 1 | 0.5<br>(0.15-0.85)  |
| Sinusitis       | 3 | 2 | 0.67<br>(0.31-1)    | 1 | 0 | 0                   | 0 | 0 | 0 | 3 | 2 | 0.67<br>(0.31-1)    |
| Aplastic anemia | 2 | 0 | 0                   | 1 | 0 | 0                   | 2 | 0 | 0 | 1 | 0 | 0                   |
| Endophthalmitis | 3 | 1 | 0.33<br>(0.16-0.51) | 1 | 0 | 0                   | 0 | 0 | 0 | 3 | 1 | 0.33<br>(0.16-0.51) |
| Other           | 6 | 3 | 0.5<br>(0.30-0.70)  | 4 | 1 | 0.25<br>(0.14-0.36) | 2 | 0 | 0 | 4 | 2 | 0.5<br>(0.26-0.75)  |

**Supplemental Table 1.** Specimen type and clinical indication for all specimens tested via universal PCR, with positivity rates for bacteria, mycobacteria, and fungi
